# Supplementary material for: Integrated analysis of lncRNA-miRNA-mRNA ceRNA network in squamous cell carcinoma of tongue
Source: Springer Nature journal article supplement (doi:10.1186/s12885-019-5983-8), 2019-08-07

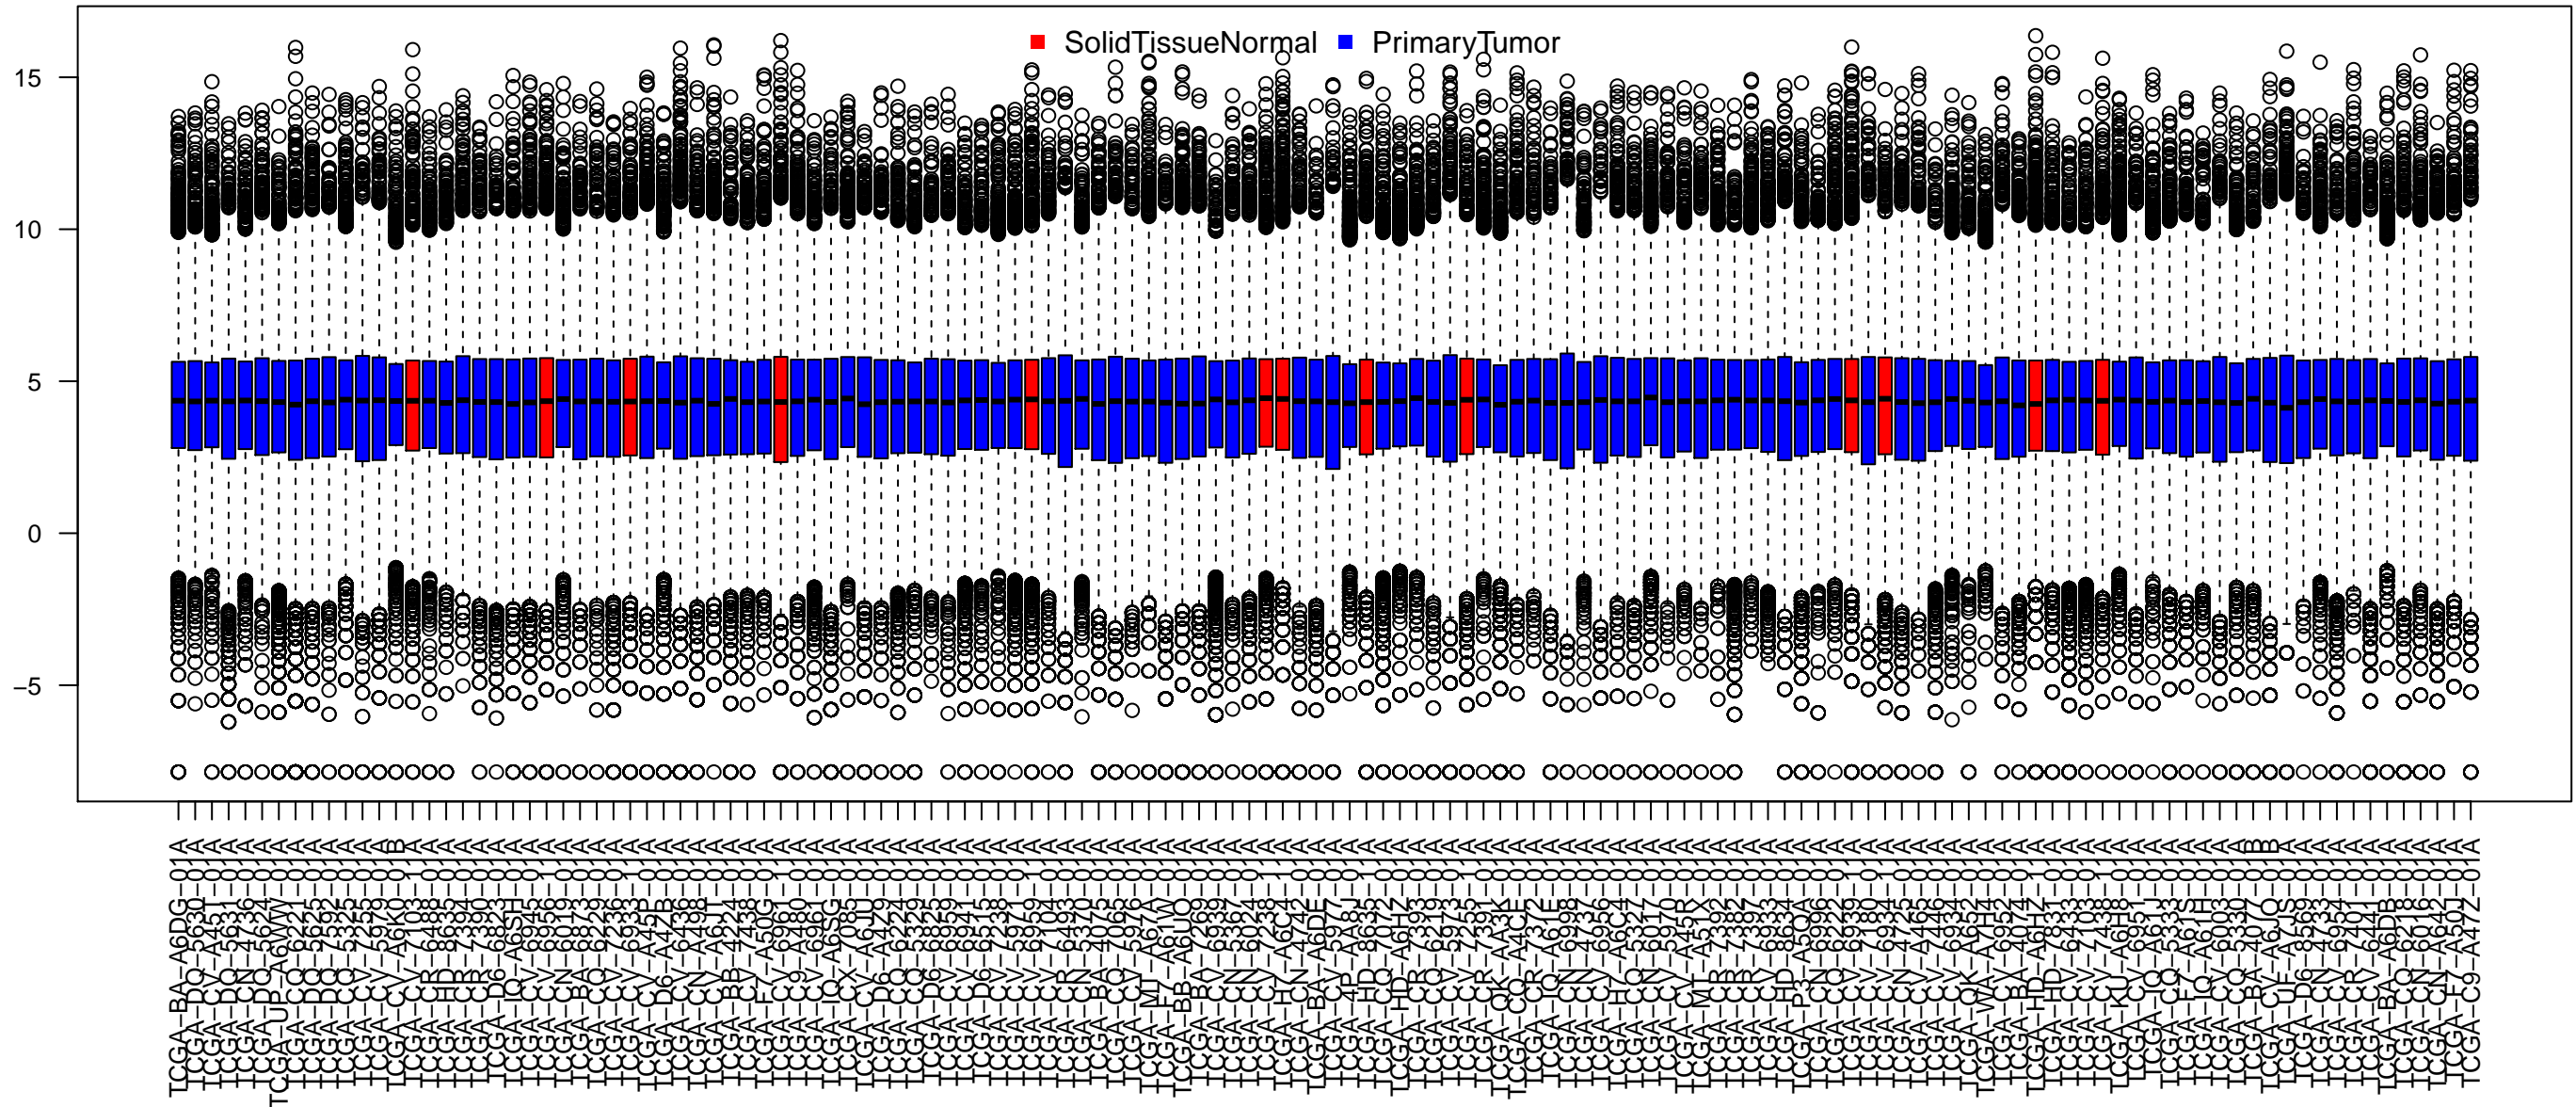

Supplement: MOESM1 [file 17047014]
